# Supplementary material
Source: PubMed Central journal article supplement (PMC8795391)
Supplement: 41419_2022_4535_MOESM7_ESM.pdf [file 41419_2022_4535_MOESM7_ESM.pdf]

*“Transfer of the Longevity associated variant of BPIFB4 gene rejuvenates immune system and vasculature by a reduction of CD38+macrophages and NAD+ decline”*

## GATING STRATEGY

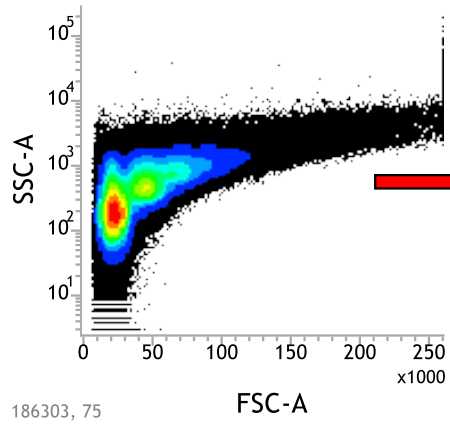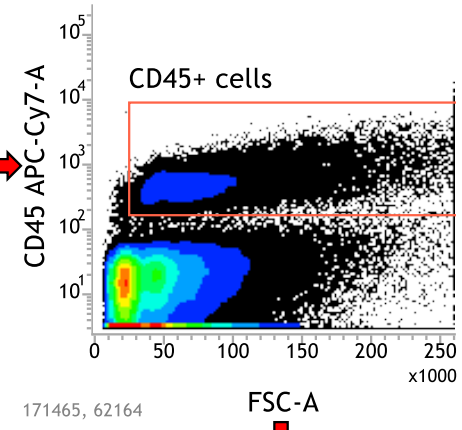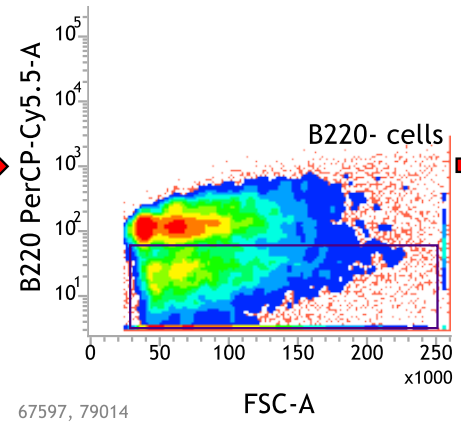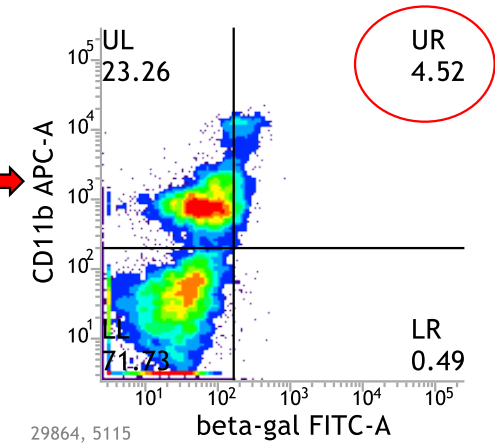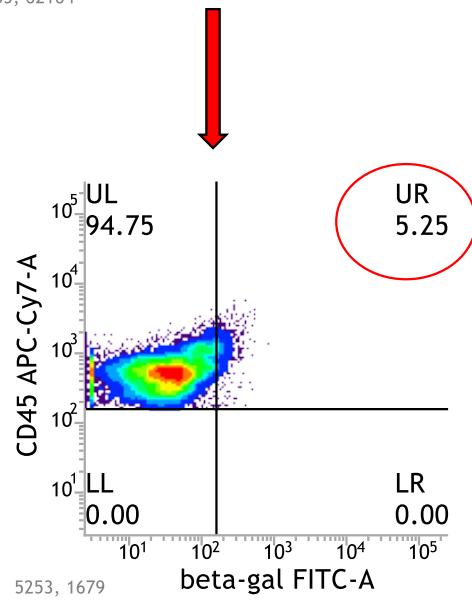

Gating Strategy for Fig.1A & Fig.1B

**BLOOD**

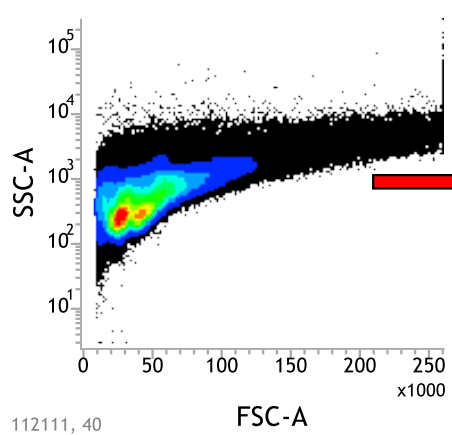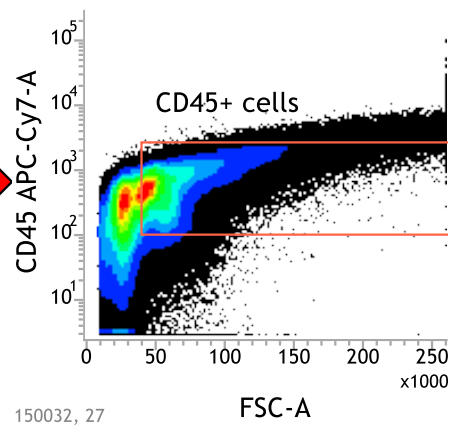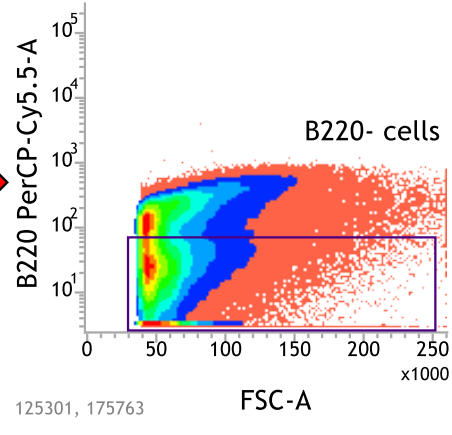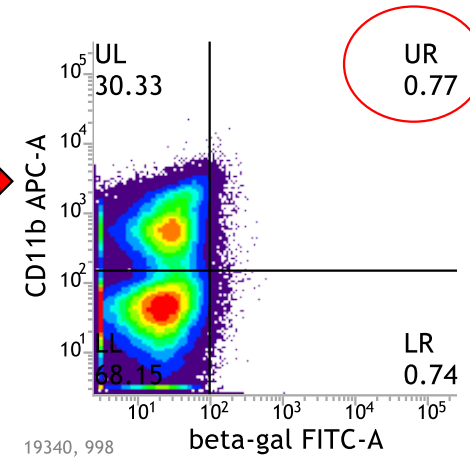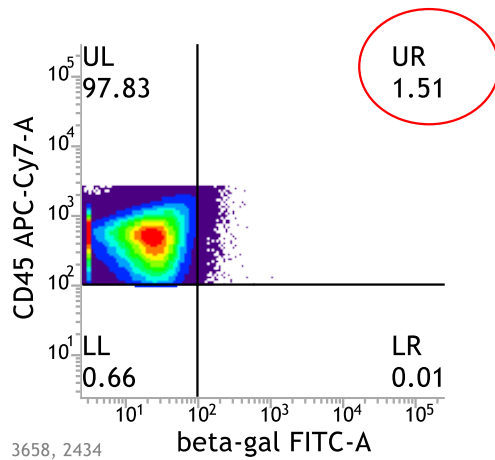

Gating Strategy for Fig.1A & Fig.1B  
**SPLEEN**

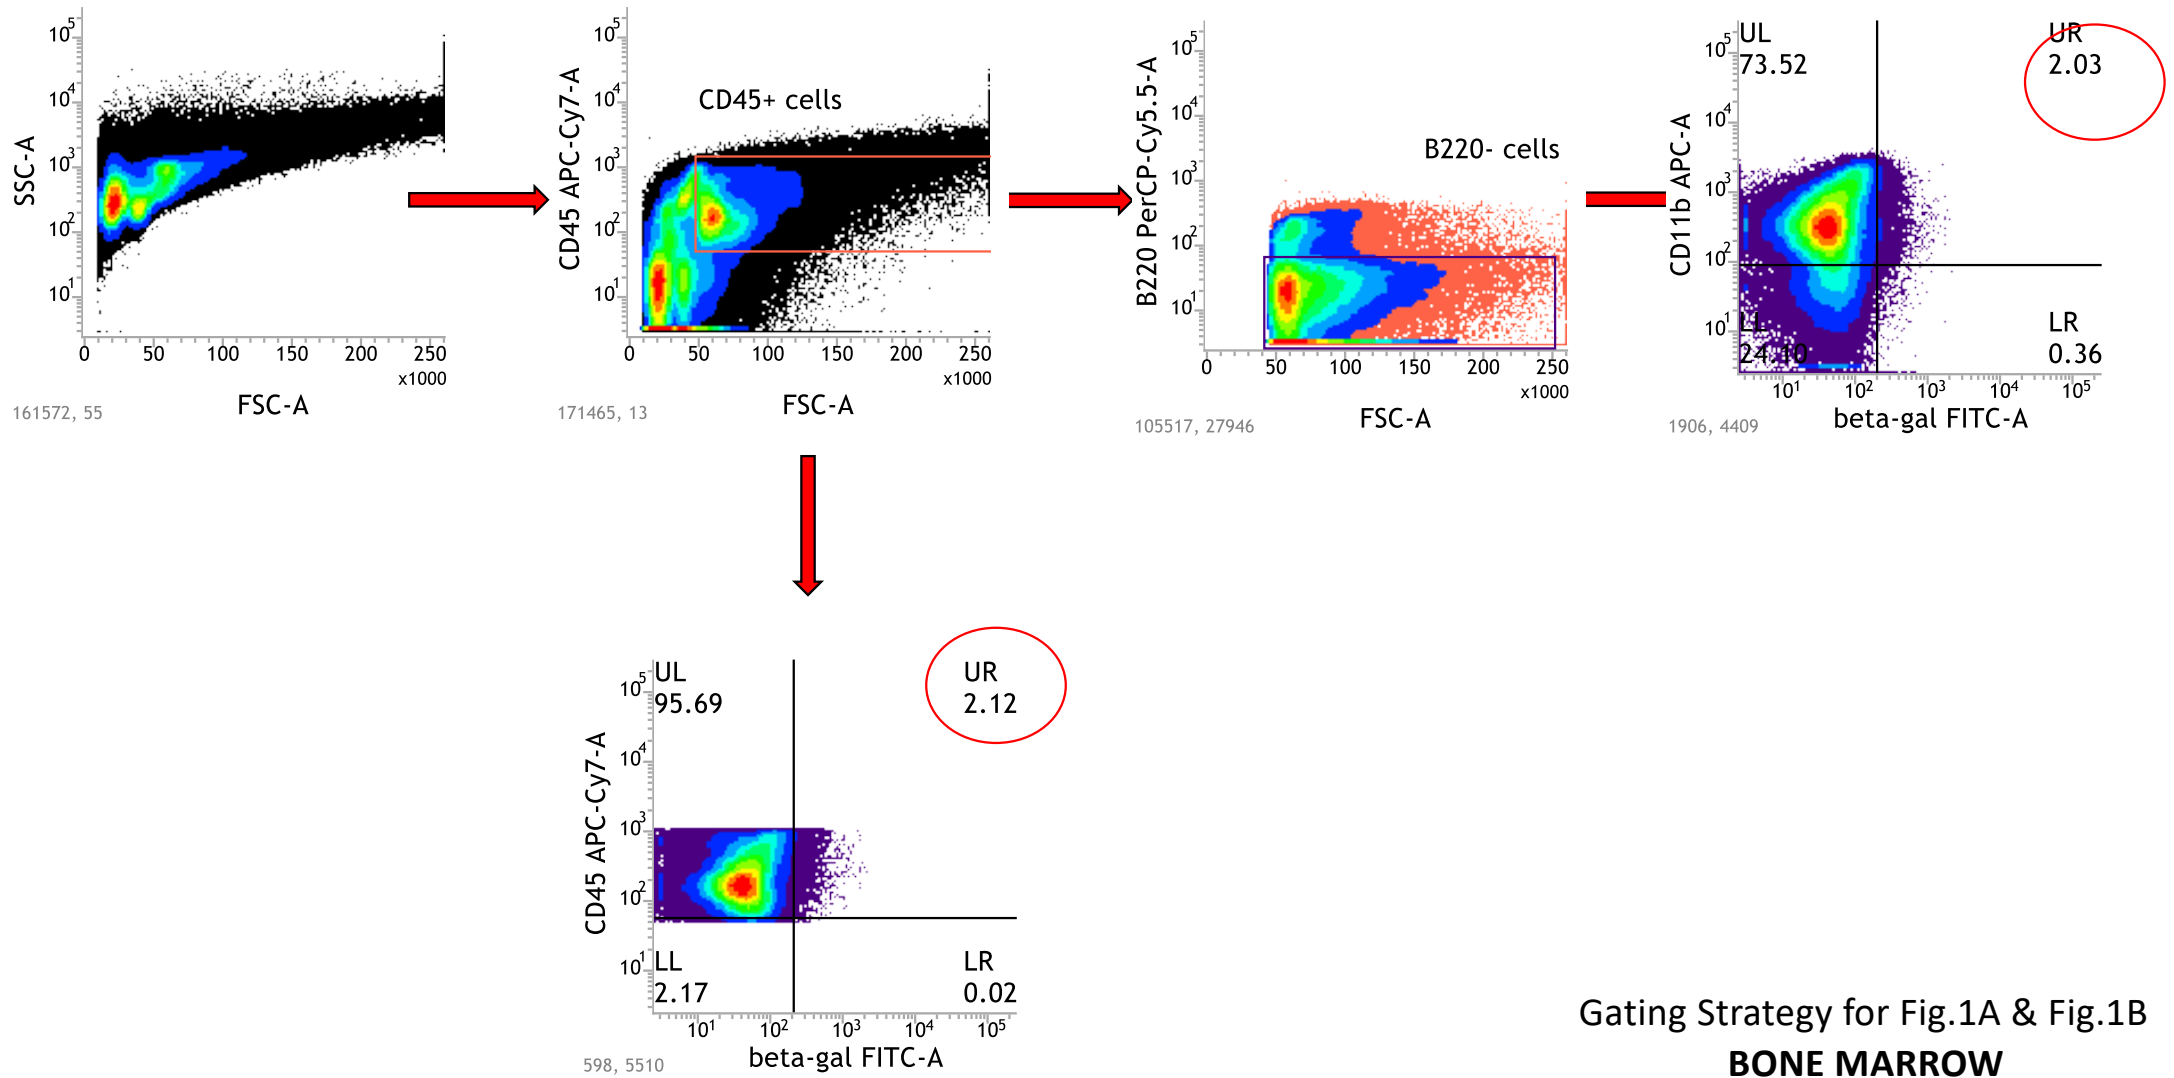

Gating Strategy for Fig.1A & Fig.1B  
**BONE MARROW**

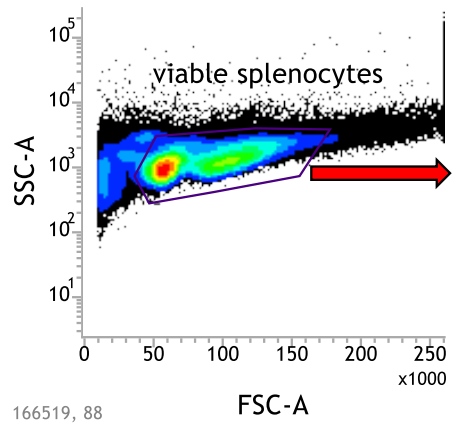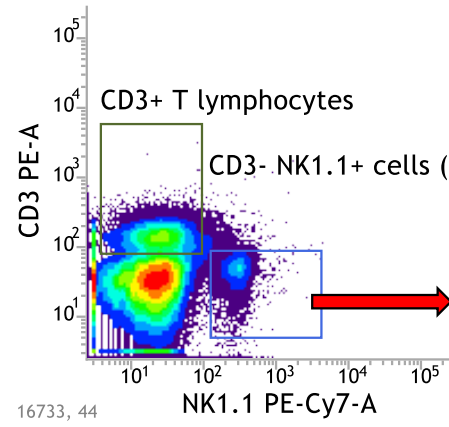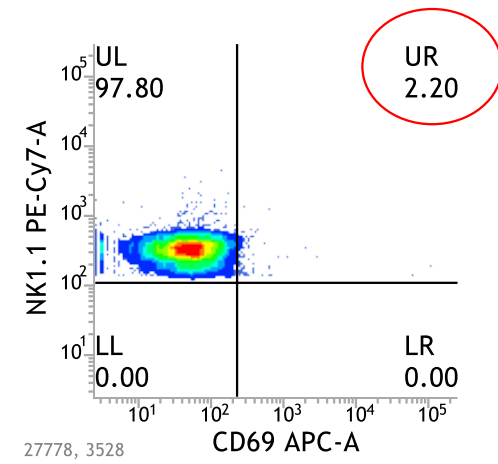

Gating Strategy for Fig.3A  
**SPLEEN**

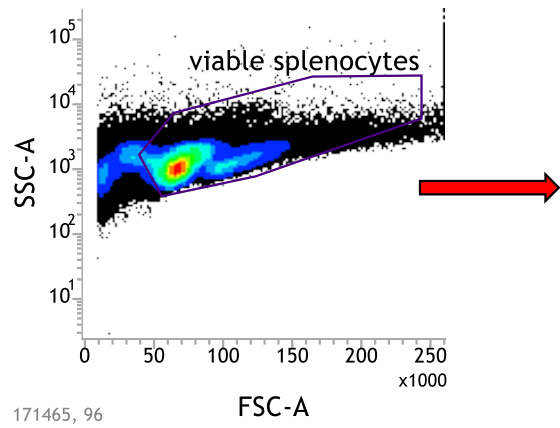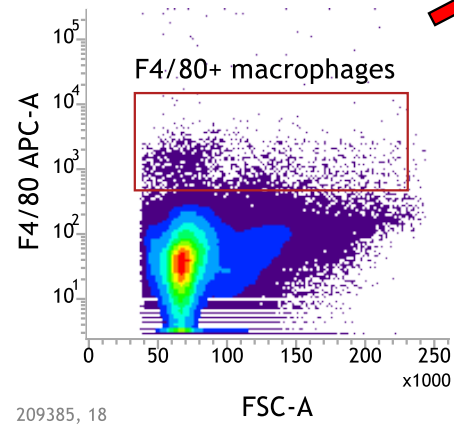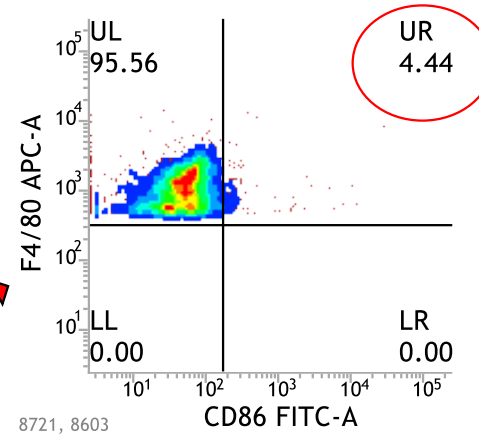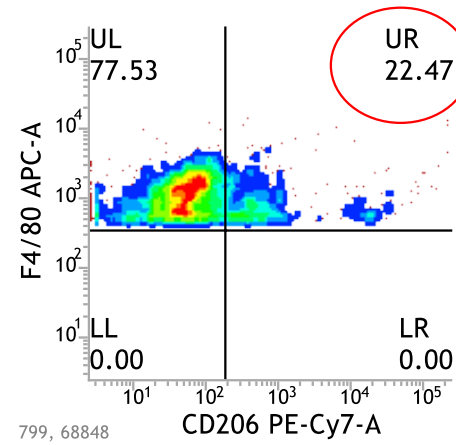

Gating Strategy for Fig.3B  
**SPLEEN**

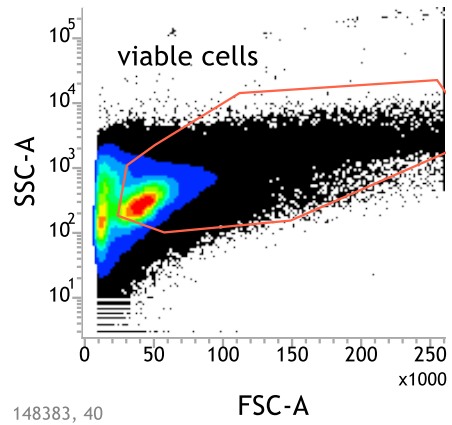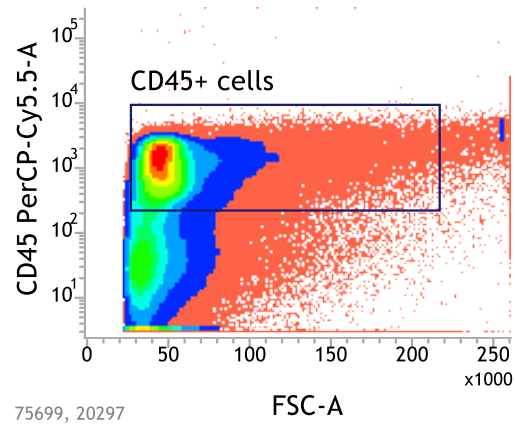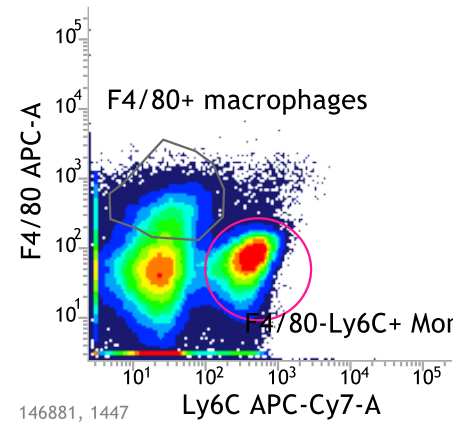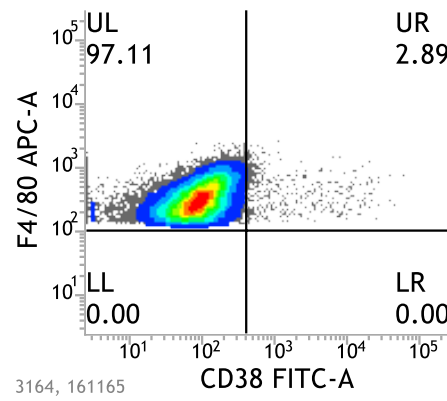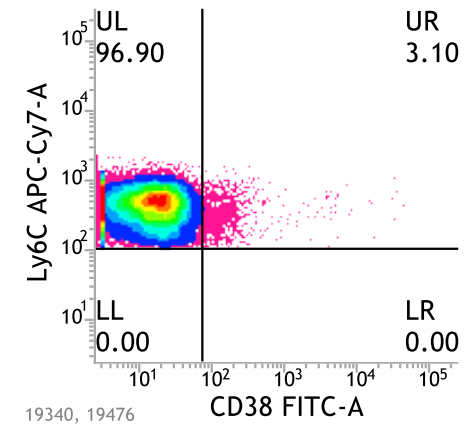

Gating Strategy for Fig.3D-E  
**SPLEEN**

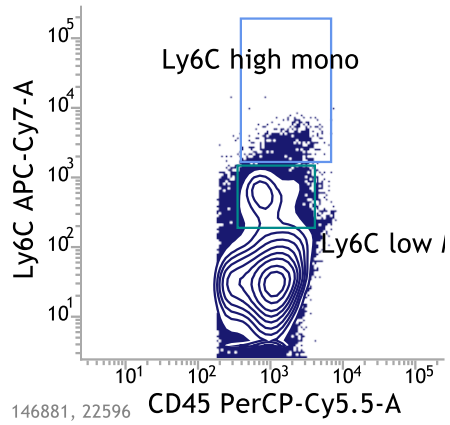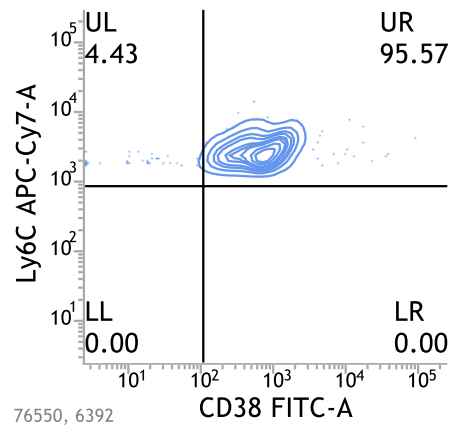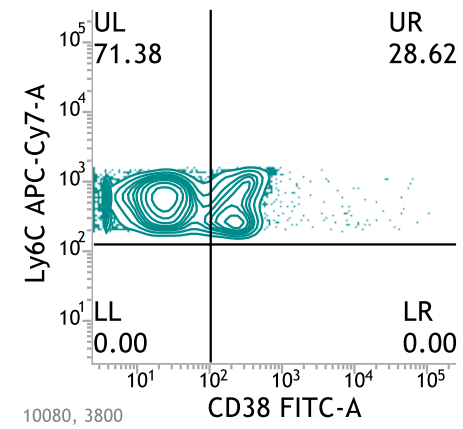

Gating Strategy for Fig.3F  
**SPLEEN**
